# Supplementary material
Source: publisher site journal article supplement (https://www.dovepress.com/article/245642)
Supplement: Supplementary file 1 [file get_supplementary_file.php]

**Table S1: EMBASE search strategy**

Database: Embase 1974 to 2019 October 18 
Search date: October 20, 2019

| **#** | **Searches** | **Results** |
| --- | --- | --- |
| 1 | exp atypical hemolytic uremic syndrome/ | 10838 |
| 2 | atypical h*emolytic ur*emic syndrome.mp. | 2244 |
| 3 | atypical haemolytic uraemic syndrome.mp. | 369 |
| 4 | ahus.mp. | 1799 |
| 5 | atypical HUS.mp. | 651 |
| 6 | or/1-5 | 11408 |
| 7 | epidemiology/ | 205521 |
| 8 | prevalence/ | 675206 |
| 9 | incidence/ | 376504 |
| 10 | cohort analysis/ | 520283 |
| 11 | cross-sectional study/ | 321664 |
| 12 | follow up/ | 1470910 |
| 13 | longitudinal study/ | 132127 |
| 14 | retrospective study/ | 840563 |
| 15 | prospective study/ | 559896 |
| 16 | observational study/ | 181620 |
| 17 | correlational study/ | 39616 |
| 18 | epidemiologic.ab,ti. | 80402 |
| 19 | cohort?.ab,ti. | 925838 |
| 20 | cross sectional.ab,ti. | 427310 |
| 21 | follow up.ab,ti. | 1442382 |
| 22 | longitudinal.ab,ti. | 309749 |
| 23 | retrospective$.ab,ti. | 1149964 |
| 24 | prospective$.ab,ti. | 1024783 |
| 25 | observational.ab,ti. | 255485 |
| 26 | adverse effect?.ab,ti. | 204047 |
| 27 | (Controlled before and after).ab,ti. | 1261 |
| 28 | Interrupted time series.ab,ti. | 3429 |
| 29 | Correlational.ab,ti. | 13863 |
| 30 | ecological stud$.ab,ti. | 4790 |
| 31 | Descriptive stud$.ab,ti. | 39235 |
| 32 | or/7-31 | 5645103 |
| 33 | 6 and 32 | 2750 |

**Table S2: MEDLINE search strategy**

Database: Ovid MEDLINE(R) and Epub Ahead of Print, In-Process & Other Non-Indexed Citations, Daily and Versions(R) 1946 to October 18, 2019 
Search date: October 20, 2019

| **#** | **Searches** | **Results** |
| --- | --- | --- |
| 1 | exp atypical hemolytic uremic syndrome/ | 621 |
| 2 | atypical h*emolytic ur*emic syndrome.mp. | 1329 |
| 3 | atypical haemolytic uraemic syndrome.mp. | 201 |
| 4 | ahus.mp. | 804 |
| 5 | atypical HUS.mp. | 300 |
| 6 | or/1-5 | 1533 |
| 7 | prevalence/ | 276635 |
| 8 | incidence/ | 249874 |
| 9 | Epidemiologic Studies/ | 8130 |
| 10 | exp Cohort Studies/ | 1912251 |
| 11 | Cross-Sectional Studies/ | 307144 |
| 12 | (epidemiologic adj (study or studies)).ab,ti. | 25771 |
| 13 | (cohort adj (study or studies)).ab,ti. | 186735 |
| 14 | cross sectional.ab,ti. | 324674 |
| 15 | cohort analy$.ab,ti. | 7337 |
| 16 | (follow up adj (study or studies)).ab,ti. | 47699 |
| 17 | longitudinal.ab,ti. | 230141 |
| 18 | retrospective$.ab,ti. | 687009 |
| 19 | prospective$.ab,ti. | 663634 |
| 20 | (observ$ adj3 (study or studies)).ab,ti. | 178383 |
| 21 | adverse effect?.ab,ti. | 148152 |
| 22 | or/7-21 | 3315593 |
| 23 | 6 and 22 | 210 |

**Table S3: Eligibility Criteria**

| Inclusion Criteria | Exclusion Criteria |
| --- | --- |
| - Individuals (all ages) diagnosed with atypical hemolytic uremic syndrome (aHUS) - Observational studies (e.g. controlled before-and-after studies, interrupted time series studies, historically controlled studies, prospective and retrospective cohort studies, case-control studies, cross-sectional studies, controlled and uncontrolled longitudinal studies) - Studies must report general population aHUS incidence or prevalence estimates  **and/or**  Incidence or prevalence estimates of aHUS among individuals with any specific comorbid disease | - All studies exclusively reporting pregnancy related aHUS - Letters, editorials, case reports/case series, randomized controlled trials, non-randomized studies, and review articles - Studies reporting only mortality and/or natural history of aHUS with no other epidemiologic estimates (incidence or prevalence) - Studies not reporting specific incidence and/or prevalence estimates - All studies not published in English were excluded |

**Table S4:** **NIH Quality Assessment Tool for observational cohort and cross-sectional studies**

The National Institutes of Health (NIH) Quality Assessment Tool was used for observational cohort and cross-sectional studies. All the studies were assigned a yes, no, or other to each of the 14 criteria outlined in the appraisal tool. Then by considering each criterion, the investigators evaluated the overall quality of the study and assigned an overall good, fair, poor rating to each study.

| Criteria | Yes | No | Other (CD, NA, NR)* |
| --- | --- | --- | --- |
| 1. Was the research question or objective in this paper clearly stated? |  |  |  |
| 2. Was the study population clearly specified and defined? |  |  |  |
| 3. Was the participation rate of eligible persons at least 50%? |  |  |  |
| 4. Were all the subjects selected or recruited from the same or similar populations (including the same time period)? Were inclusion and exclusion criteria for being in the study prespecified and applied uniformly to all participants? |  |  |  |
| 5. Was a sample size justification, power description, or variance and effect estimates provided? |  |  |  |
| 6. For the analyses in this paper, were the exposure(s) of interest measured prior to the outcome(s) being measured? |  |  |  |
| 7. Was the timeframe sufficient so that one could reasonably expect to see an association between exposure and outcome if it existed? |  |  |  |
| 8. For exposures that can vary in amount or level, did the study examine different levels of the exposure as related to the outcome (e.g., categories of exposure, or exposure measured as continuous variable)? |  |  |  |
| 9. Were the exposure measures (independent variables) clearly defined, valid, reliable, and implemented consistently across all study participants? |  |  |  |
| 10. Was the exposure(s) assessed more than once over time? |  |  |  |
| 11. Were the outcome measures (dependent variables) clearly defined, valid, reliable, and implemented consistently across all study participants? |  |  |  |
| 12. Were the outcome assessors blinded to the exposure status of participants? |  |  |  |
| 13. Was loss to follow-up after baseline 20% or less? |  |  |  |
| 14. Were key potential confounding variables measured and adjusted statistically for their impact on the relationship between exposure(s) and outcome(s)? |  |  |  |

*CD, cannot determine; NA, not applicable; NR, not reported

**Table S5:** **NIH Quality Assessment Tool for observational cohort and cross-sectional studies results**

| Study | Bayer 2019 | Ardissino 2016 | Durkan 2016 | Jenssen 2014 | Mallett 2014 | Wuhl 2014 | Fremeaux-Bacchi 2013 | Zimmerhackl 2006 |
| --- | --- | --- | --- | --- | --- | --- | --- | --- |
| ***Criteria*** |  |  |  |  |  |  |  |  |
| 1. Was the research question or objective in this paper clearly stated? | Yes | Yes | Yes | Yes | Yes | Yes | Yes | Yes |
| 2. Was the study population clearly specified and defined? | Yes | Yes | Yes | Yes | Yes | Yes | Yes | Yes |
| 3. Was the participation rate of eligible persons at least 50%? | CD | CD | Yes | CD | NA | NA | CD | CD |
| 4. Were all the subjects selected or recruited from the same or similar populations (including the same time period)? Were inclusion and exclusion criteria for being in the study prespecified and applied uniformly to all participants? | Yes | Yes | Yes | Yes | Yes | Yes | Yes | Yes |
| 5. Was a sample size justification, power description, or variance and effect estimates provided? | NA | NA | NA | NA | NA | NA | NA | NA |
| 6. For the analyses in this paper, were the exposure(s) of interest measured prior to the outcome(s) being measured? | NA | NA | NA | NA | NA | NA | NA | NA |
| 7. Was the timeframe sufficient so that one could reasonably expect to see an association between exposure and outcome if it existed? | NA | NA | NA | NA | NA | NA | NA | NA |
| 8. For exposures that can vary in amount or level, did the study examine different levels of the exposure as related to the outcome (e.g., categories of exposure, or exposure measured as continuous variable)? | NA | NA | NA | NA | NA | NA | NA | NA |
| 9. Were the exposure measures (independent variables) clearly defined, valid, reliable, and implemented consistently across all study participants? | NA | NA | NA | NA | NA | NA | NA | NA |
| 10. Was the exposure(s) assessed more than once over time? | NA | NA | NA | NA | NA | NA | NA | NA |
| 11. Were the outcome measures (dependent variables) clearly defined, valid, reliable, and implemented consistently across all study participants? | Yes | Yes | Yes | Yes | Yes | Yes | Yes | Yes |
| 12. Were the outcome assessors blinded to the exposure status of participants? | NA | NA | NA | NA | NA | NA | NA | NA |
| 13. Was loss to follow-up after baseline 20% or less? | NA | NA | Yes | NA | NA | NA | NA | CD |
| 14. Were key potential confounding variables measured and adjusted statistically for their impact on the relationship between exposure(s) and outcome(s)? | NA | NA | NA | NA | NA | NA | NA | NA |

**Table S6: PRISMA Checklist**

| **Section/topic** | **#** | **Checklist item** | **Reported on page #** |
| --- | --- | --- | --- |
| **TITLE** | | | 1 |
| Title | 1 | Identify the report as a systematic review, meta-analysis, or both. | 1 |
| **ABSTRACT** | | | 1 |
| Structured summary | 2 | Provide a structured summary including, as applicable: background; objectives; data sources; study eligibility criteria, participants, and interventions; study appraisal and synthesis methods; results; limitations; conclusions and implications of key findings; systematic review registration number. | 1 |
| **INTRODUCTION** | | | 2 |
| Rationale | 3 | Describe the rationale for the review in the context of what is already known. | 1/2 |
| Objectives | 4 | Provide an explicit statement of questions being addressed with reference to participants, interventions, comparisons, outcomes, and study design (PICOS). | 2 |
| **METHODS** | | | 3 |
| Protocol and registration | 5 | Indicate if a review protocol exists, if and where it can be accessed (e.g., Web address), and, if available, provide registration information including registration number. | NA |
| Eligibility criteria | 6 | Specify study characteristics (e.g., PICOS, length of follow-up) and report characteristics (e.g., years considered, language, publication status) used as criteria for eligibility, giving rationale. | 2 |
| Information sources | 7 | Describe all information sources (e.g., databases with dates of coverage, contact with study authors to identify additional studies) in the search and date last searched. | 2 |
| Search | 8 | Present full electronic search strategy for at least one database, including any limits used, such that it could be repeated. | Supplementary |
| Study selection | 9 | State the process for selecting studies (i.e., screening, eligibility, included in systematic review, and, if applicable, included in the meta-analysis). | 2 |
| Data collection process | 10 | Describe method of data extraction from reports (e.g., piloted forms, independently, in duplicate) and any processes for obtaining and confirming data from investigators. | 3 |
| Data items | 11 | List and define all variables for which data were sought (e.g., PICOS, funding sources) and any assumptions and simplifications made. | 3 |
| Risk of bias in individual studies | 12 | Describe methods used for assessing risk of bias of individual studies (including specification of whether this was done at the study or outcome level), and how this information is to be used in any data synthesis. | 3 |
| Summary measures | 13 | State the principal summary measures (e.g., risk ratio, difference in means). | NA |
| Synthesis of results | 14 | Describe the methods of handling data and combining results of studies, if done, including measures of consistency (e.g., I2) for each meta-analysis. | NA |
| Risk of bias across studies | 15 | Specify any assessment of risk of bias that may affect the cumulative evidence (e.g., publication bias, selective reporting within studies). | 4 |
| Additional analyses | 16 | Describe methods of additional analyses (e.g., sensitivity or subgroup analyses, meta-regression), if done, indicating which were pre-specified. | NA |
| **RESULTS** | | | 5 |
| Study selection | 17 | Give numbers of studies screened, assessed for eligibility, and included in the review, with reasons for exclusions at each stage, ideally with a flow diagram. | 5 |
| Study characteristics | 18 | For each study, present characteristics for which data were extracted (e.g., study size, PICOS, follow-up period) and provide the citations. | 5 |
| Risk of bias within studies | 19 | Present data on risk of bias of each study and, if available, any outcome level assessment (see item 12). | 5 |
| Results of individual studies | 20 | For all outcomes considered (benefits or harms), present, for each study: (a) simple summary data for each intervention group (b) effect estimates and confidence intervals, ideally with a forest plot. | 5-7 |
| Synthesis of results | 21 | Present results of each meta-analysis done, including confidence intervals and measures of consistency. | NA |
| Risk of bias across studies | 22 | Present results of any assessment of risk of bias across studies (see Item 15). | Supplementary |
| Additional analysis | 23 | Give results of additional analyses, if done (e.g., sensitivity or subgroup analyses, meta-regression [see Item 16]). | NA |
| **DISCUSSION** | | | 7 |
| Summary of evidence | 24 | Summarize the main findings including the strength of evidence for each main outcome; consider their relevance to key groups (e.g., healthcare providers, users, and policy makers). | 8 |
| Limitations | 25 | Discuss limitations at study and outcome level (e.g., risk of bias), and at review-level (e.g., incomplete retrieval of identified research, reporting bias). | 8 |
| Conclusions | 26 | Provide a general interpretation of the results in the context of other evidence, and implications for future research. | 9 |
| **FUNDING** | | | 9 |
| Funding | 27 | Describe sources of funding for the systematic review and other support (e.g., supply of data); role of funders for the systematic review. | 9 |
